# Supplementary material for: Large-scale pan-cancer analysis reveals broad prognostic association between TGF-β ligands, not Hedgehog, and GLI1/2 expression in tumors
Source: PubMed Central journal article supplement (PMC7468122; doi:10.1038/s41598-020-71559-w), 2020-09-02
Supplement: 41598_2020_71559_MOESM2_ESM.pdf [file 41598_2020_71559_MOESM2_ESM.pdf]

## Supplementary information

### **Large-scale pan-cancer analysis reveals broad prognostic association between TGF- $\beta$ ligands, not Hedgehog, and GLI1/2 expression in tumors**

Aurélien de Reyniès<sup>1\*</sup>, Delphine Javelaud<sup>2,3</sup>, Nabila Elarouci<sup>1</sup>, Véronique Marsaud<sup>2,3</sup>, Cristèle Gilbert<sup>2,3</sup>, and Alain Mauviel<sup>2,3\*</sup>

<sup>1</sup>Programme Cartes d'Identité des Tumeurs, Ligue Nationale Contre le Cancer, 14 rue Corvisart, 75013 Paris, France

<sup>2</sup>Institut Curie, PSL Research University, INSERM U1021, CNRS UMR3347, Team "TGF- $\beta$  and Oncogenesis", Equipe Labellisée LIGUE 2016, F-91400, Orsay, France

<sup>3</sup>Université Paris-Sud, F-91400, Orsay, France

\*Co-corresponding authors: Dr Aurélien de Reyniès, Programme Cartes d'Identité des Tumeurs, Ligue Nationale Contre le Cancer, 14 rue Corvisart, 75013 Paris, France; P: +33 1 53 55 25 12; E-mail: [Aurelien.DeReynies@ligue-cancer.net](mailto:Aurelien.DeReynies@ligue-cancer.net); and Dr Alain Mauviel, Team "TGF- $\beta$  and Oncogenesis", Institut Curie, University center, Bldg 110, 91405 Orsay cedex, France; P: +33 1 69 86 30 43; Fax : +33 1 69 86 30 51 ; E-mail: [alain.mauviel@curie.fr](mailto:alain.mauviel@curie.fr)

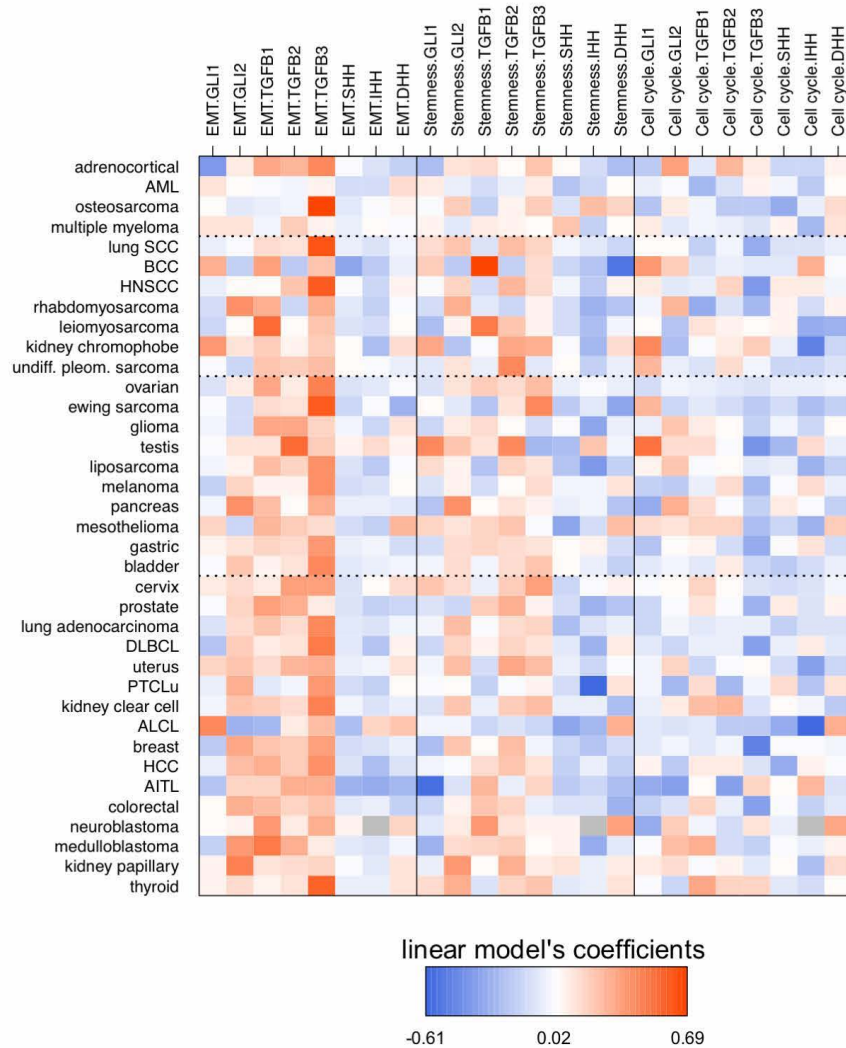

**Supplementary Figure S1.** Heatmap representation of the coefficients from the linear models generated for each of the 3 metagenes in each tumor type, based on the expression of *GLI1*, *GLI2*, *TGFB1*, *TGFB2*, *TGFB3*, *SHH*, *IDH*, *DHH*. The corresponding numerical values are provided in Supplementary Table S4B.

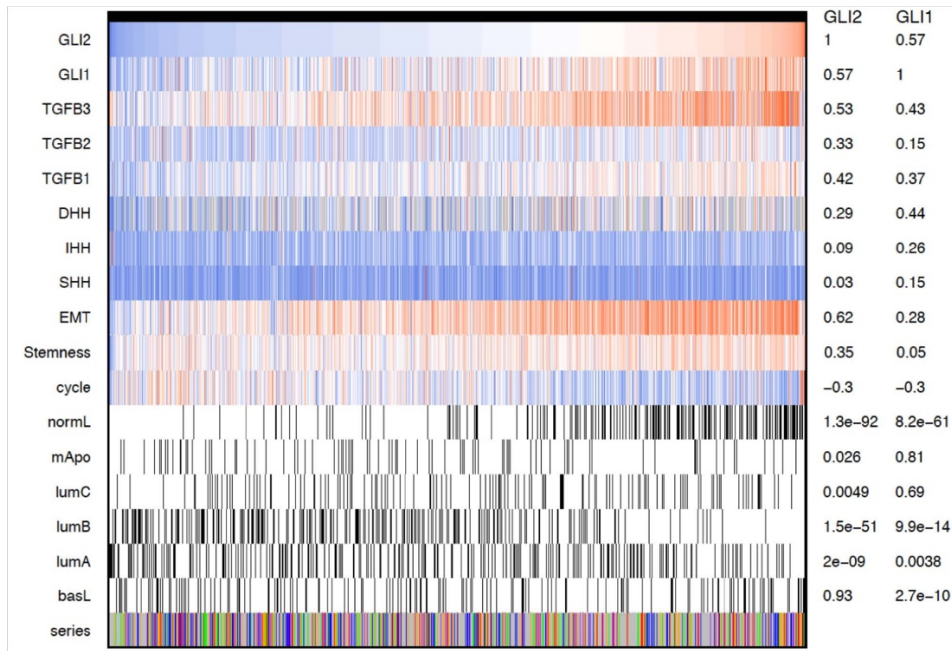

**Supplementary Figure S2.** Alignment of *GLI1*, *GLI2*, *SHH*, *DHH*, *IHH*, *TGFB1*, *TGFB2* and *TGFB3* as well as mesenchymal/EMT, Stemness and Cell cycle metagene expression profiles with molecular subtypes of breast carcinomas (6 series, 2556 patients).
